# Supplementary material for: Ex-ante life cycle assessment of polyols using carbon captured from industrial process gas
Source: Royal Society of Chemistry journal article supplement (doi:10.1039/d3gc00799e), 2023-01-01
Supplement: d3gc00799e1.pdf [file d3gc00799e1.pdf]

# Ex-ante Life Cycle Assessment of polyols using carbon captured from industrial process gas

Natalya Tsoy,<sup>\*a</sup> Bernhard Steubing<sup>a</sup> and Jeroen B. Guinée<sup>a</sup>

## Supporting information

---

<sup>a</sup> *Institute of Environmental Sciences (CML), Leiden University, Einsteinweg 2, 2333 CC Leiden, the Netherlands. E-mail: n.tsoy@cml.leidenuniv.nl*

## Calculations

### a) Estimation of emissions for the thermal oxidation processes

Emissions for thermal oxidation of the waste stream from polyols production for scenario 3 were estimated as follows: The waste stream is composed of dioxane, ethylene oxide (EO), and ethanal. Stoichiometric calculations were done to estimate emissions coming from the combustion (reaction with O<sub>2</sub>) of these chemicals.

Thermal oxidation of dioxane (C<sub>4</sub>H<sub>8</sub>O<sub>2</sub>)

$$m(\text{C}_4\text{H}_8\text{O}_2) = 2847.70 \text{ g}$$

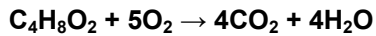

$$M(\text{C}_4\text{H}_8\text{O}_2) = 88.11 \text{ g/mol}$$

$$n(\text{C}_4\text{H}_8\text{O}_2) = \frac{2847.70 \text{ g}}{88.11 \text{ g/mol}} = 32.32 \text{ mol}$$

$$m(\text{CO}_2) = 32.32 \text{ mol} * 4 * 44.01 \text{ g/mol} = 5689.61 \text{ g} = 5.69 \text{ kg}$$

$$m(\text{H}_2\text{O}) = 32.32 \text{ mol} * 4 * 18.02 \text{ g/mol} = 2329.63 \text{ g} = 2.33 \text{ kg}$$

Thermal oxidation of EO (C<sub>2</sub>H<sub>4</sub>O)

$$m(\text{C}_2\text{H}_4\text{O}) = 85545.03 \text{ g}$$

$$M(\text{C}_2\text{H}_4\text{O}) = 44.05 \text{ g/mol}$$

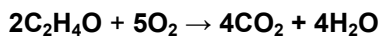

$$n(\text{C}_2\text{H}_4\text{O}) = \frac{85545.03 \text{ g}}{44.05 \text{ g/mol}} = 1942.00 \text{ mol}$$

$$m(\text{CO}_2) = 1942.00 \text{ mol} * 2 * 44.01 \text{ g/mol} = 170934.84 \text{ g} = 170.93 \text{ kg}$$

$$m(\text{H}_2\text{O}) = 1942.00 \text{ mol} * 2 * 18.02 \text{ g/mol} = 69989.68 \text{ g} = 69.99 \text{ kg}$$

Thermal oxidation of ethanal (CH<sub>3</sub>CHO)

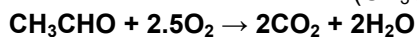

$$m(\text{CH}_3\text{CHO}) = 5695.41 \text{ g}$$

$$M(\text{CH}_3\text{CHO}) = 44.05 \text{ g/mol}$$

$$n(\text{CH}_3\text{CHO}) = \frac{5695.41 \text{ g}}{44.05 \text{ g/mol}} = 129.29 \text{ mol}$$

$$m(\text{CO}_2) = 129.29 \text{ mol} * 2 * 44.01 \text{ g/mol} = 11380.11 \text{ g} = 11.38 \text{ kg}$$

$$m(\text{H}_2\text{O}) = 129.29 \text{ mol} * 2 * 18.02 \text{ g/mol} = 4659.61 \text{ g} = 4.66 \text{ kg}$$

The same calculation procedure was used to calculate emissions for thermal oxidation of the waste stream from the intermediate production in scenario 3, and for the thermal oxidation of the waste streams in scenario 1 and scenario 2.

## LCA data

The aggregated LCA data for gas conditioning<sup>1,2</sup> and the CCU polyols<sup>3</sup> production in scenarios 1, 2 and 3 are shown in the tables Table SI 1, Table SI 2, and Table SI 3. Chemicals were excluded from the tables due to the confidentiality issues.

Table SI 1 LCA inputs and outputs for scenario 1: selective catalytic combustion and CO-based polyol production (including intermediate production).

|                                | Ecoinvent process                                                                                       | Value                | Unit           |
|--------------------------------|---------------------------------------------------------------------------------------------------------|----------------------|----------------|
| <b>Economic inputs</b>         |                                                                                                         |                      |                |
| Electricity                    | [G5013] electricity, medium voltage market group for electricity, medium voltage [RER]                  | 3.02*10 <sup>7</sup> | kWh            |
| Steam                          | [G14660] heat, from steam, in chemical industry market for heat, from steam, in chemical industry [RER] | 8.25*10 <sup>7</sup> | MJ             |
| <b>Economic outputs</b>        |                                                                                                         |                      |                |
| CO-based polyol                |                                                                                                         | 5*10 <sup>7</sup>    | kg             |
| <b>Environmental resources</b> |                                                                                                         |                      |                |
| Cooling water                  | [E702] Water, cooling, unspecified natural origin [('natural resource', 'in water')]                    | 7.80*10 <sup>6</sup> | m <sup>3</sup> |
| <b>Environmental emissions</b> |                                                                                                         |                      |                |
| Water                          | Water [('water',,)]                                                                                     | 7.80*10 <sup>6</sup> | m <sup>3</sup> |
| Carbon dioxide                 | Carbon dioxide, fossil [('air', 'non-urban air or from high stacks')]                                   | 7.44*10 <sup>6</sup> | kg             |

Table SI 2 LCA inputs and outputs for scenario 2: selective catalytic combustion, CO-based polyol production (including intermediate production) and CO<sub>2</sub>-based polyol production.

|                               | Ecoinvent process                                                                                       | Value                | Unit |
|-------------------------------|---------------------------------------------------------------------------------------------------------|----------------------|------|
| <b>Economic inputs</b>        |                                                                                                         |                      |      |
| Electricity                   | [G5013] electricity, medium voltage market group for electricity, medium voltage [RER]                  | 7.48*10 <sup>7</sup> | kWh  |
| Steam                         | [G14660] heat, from steam, in chemical industry market for heat, from steam, in chemical industry [RER] | 8.66*10 <sup>7</sup> | MJ   |
| <b>Economic outputs</b>       |                                                                                                         |                      |      |
| CO-based polyol               |                                                                                                         | 5*10 <sup>7</sup>    | kg   |
| CO <sub>2</sub> -based polyol |                                                                                                         | 9.93*10 <sup>7</sup> | kg   |
| <b>Environmental</b>          |                                                                                                         |                      |      |

| resources               |                                                                                         |                   |                |
|-------------------------|-----------------------------------------------------------------------------------------|-------------------|----------------|
| Cooling water           | [E702] Water, cooling, unspecified natural origin<br>[('natural resource', 'in water')] | $1.20 \cdot 10^7$ | m <sup>3</sup> |
| Environmental emissions |                                                                                         |                   |                |
| Water                   | Water [('water',,)]                                                                     | $1.20 \cdot 10^7$ | m <sup>3</sup> |
| Carbon dioxide          | Carbon dioxide, fossil [('air', 'non-urban air or from high stacks')]                   | $7.61 \cdot 10^6$ | kg             |

Table SI 3 LCA inputs and outputs for scenario 3: chemical looping (with CO<sub>2</sub> removal), CO-based polyol production (including intermediate production) and CO<sub>2</sub>-based polyol production.

|                               | Ecoinvent process                                                                                                   | Value             | Unit           |
|-------------------------------|---------------------------------------------------------------------------------------------------------------------|-------------------|----------------|
| Economic inputs               |                                                                                                                     |                   |                |
| Electricity                   | [G5013] electricity, medium voltage market group for electricity, medium voltage [RER]                              | $6.49 \cdot 10^7$ | kWh            |
| Steam                         | [G14660] heat, from steam, in chemical industry market for heat, from steam, in chemical industry [RER]             | $6.45 \cdot 10^7$ | MJ             |
| Heat                          | [G14480] heat, district or industrial, natural gas market group for heat, district or industrial, natural gas [RER] | $2.11 \cdot 10^8$ | MJ             |
| Economic outputs              |                                                                                                                     |                   |                |
| CO-based polyol               |                                                                                                                     | $5 \cdot 10^7$    | kg             |
| CO <sub>2</sub> -based polyol |                                                                                                                     | $1.11 \cdot 10^8$ | kg             |
| Environmental resources       |                                                                                                                     |                   |                |
| Cooling water                 | [E702] Water, cooling, unspecified natural origin<br>[('natural resource', 'in water')]                             | $1.17 \cdot 10^7$ | m <sup>3</sup> |
| Environmental emissions       |                                                                                                                     |                   |                |
| Water                         | Water [('water',,)]                                                                                                 | $1.17 \cdot 10^7$ | m <sup>3</sup> |
| Carbon dioxide                | Carbon dioxide, fossil [('air', 'non-urban air or from high stacks')]                                               | $1.32 \cdot 10^7$ | kg             |

**Figures**

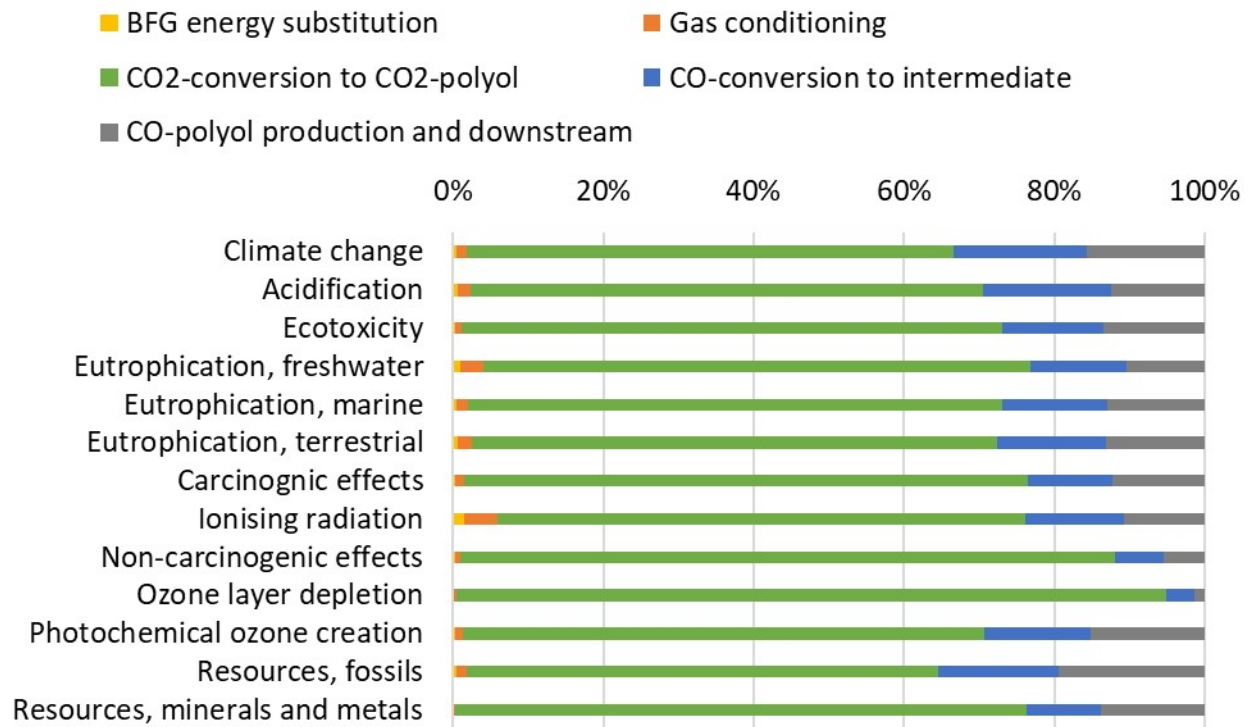

a)

b)

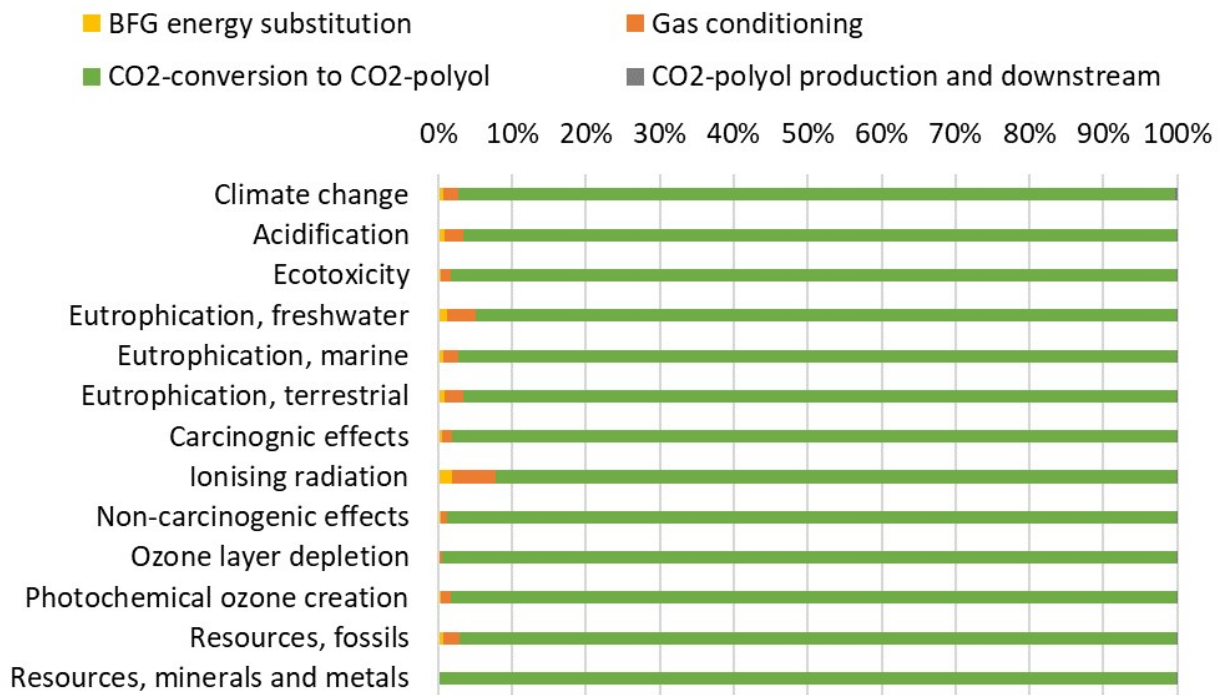

Figure SI 1 Contribution analysis results by processing steps for a) CO-based polyol and b) CO<sub>2</sub>-based polyol for scenario 2.

a)

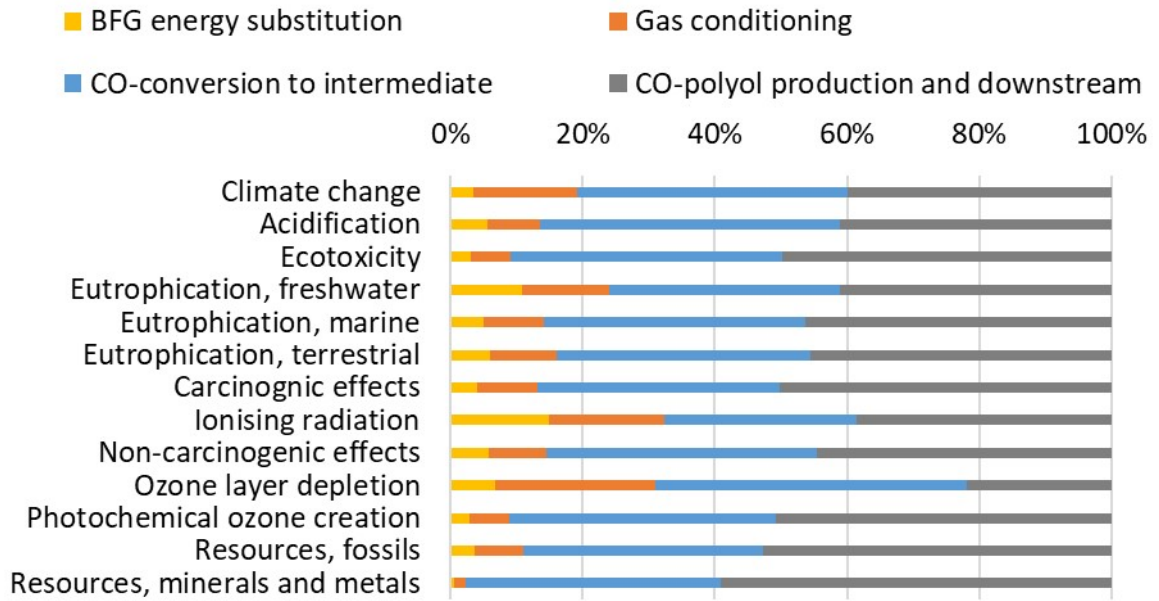

b)

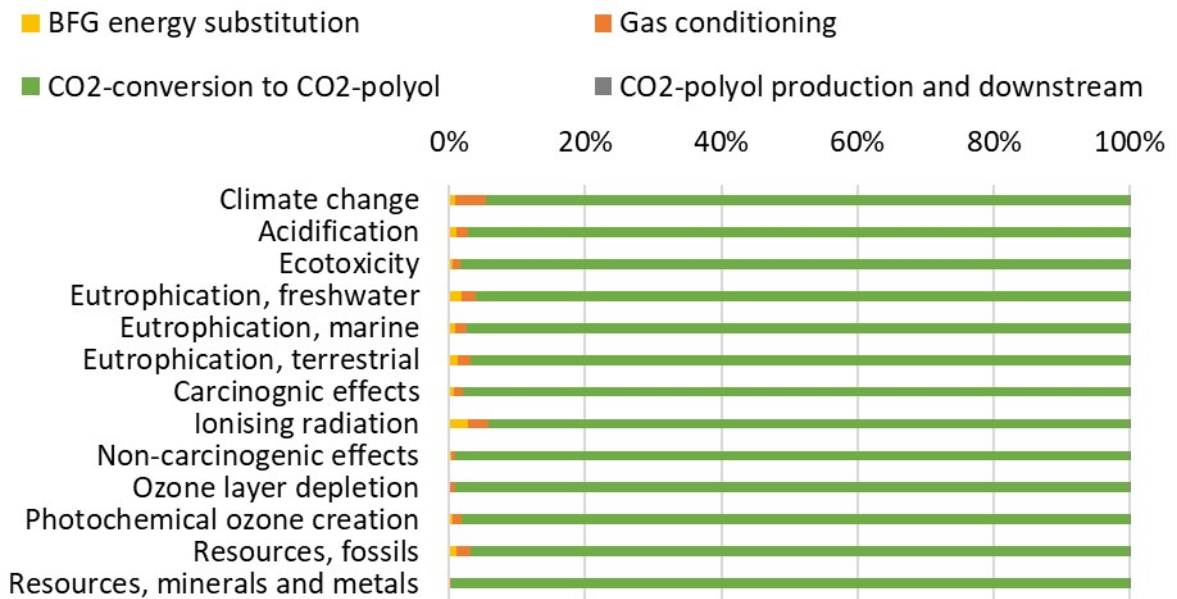

Figure SI 2 Contribution analysis results by processing steps for a) CO-based polyol and b) CO<sub>2</sub>-based polyol for scenario 3.

a)

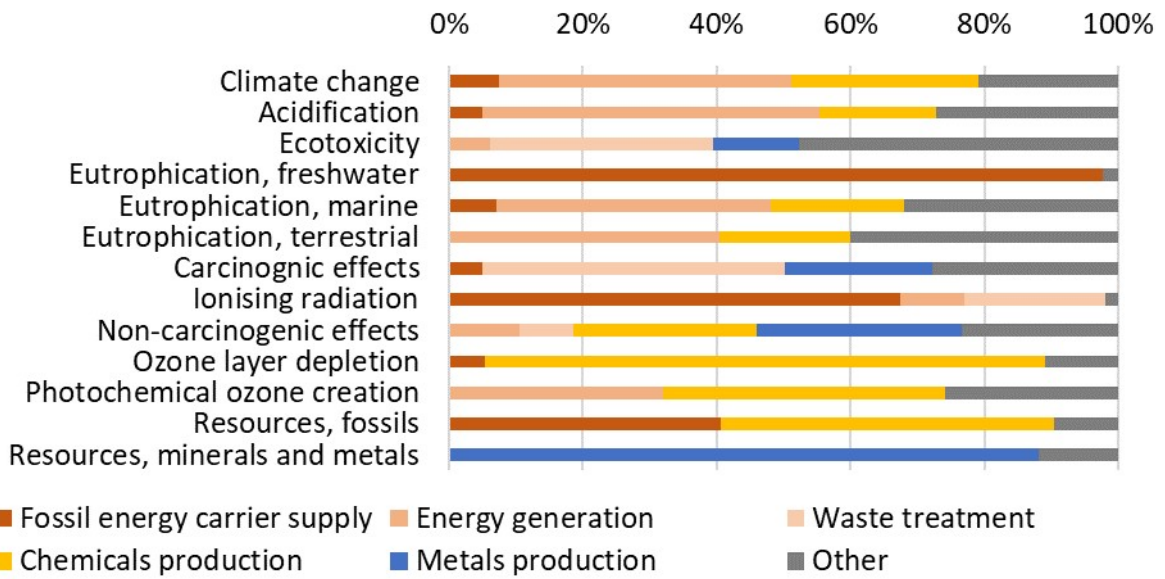

b)

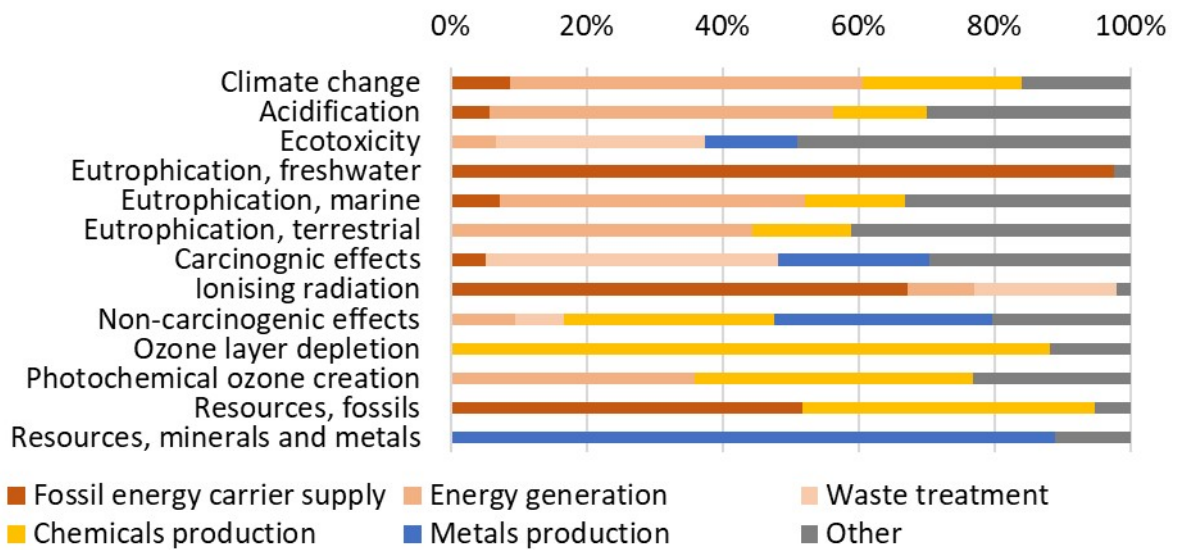

Figure SI 3 Contribution analysis results by sectors for a) CO-based polyol and b) CO<sub>2</sub>-based polyol for scenario 2.

a)

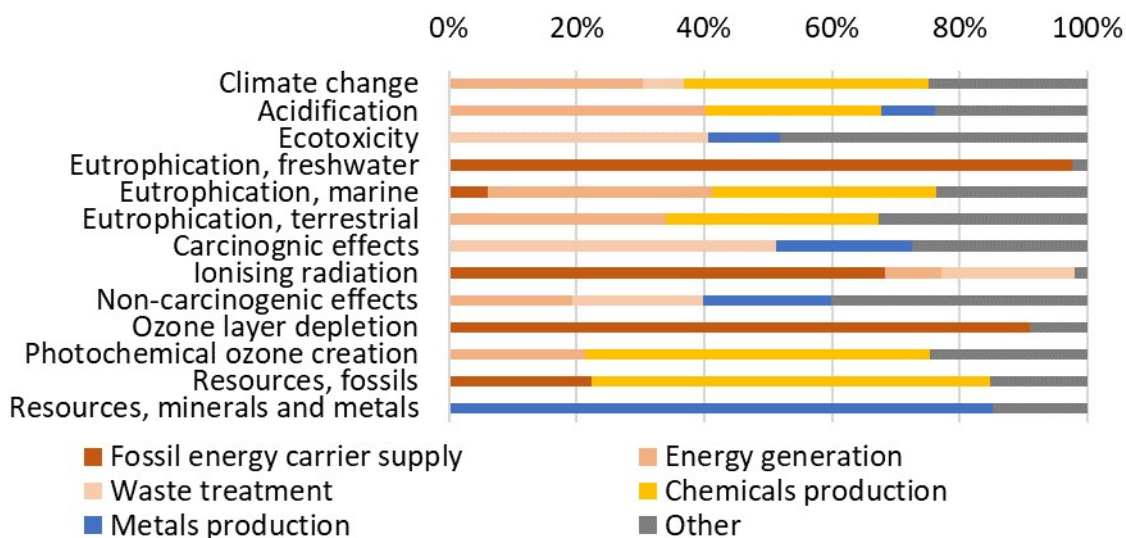

b)

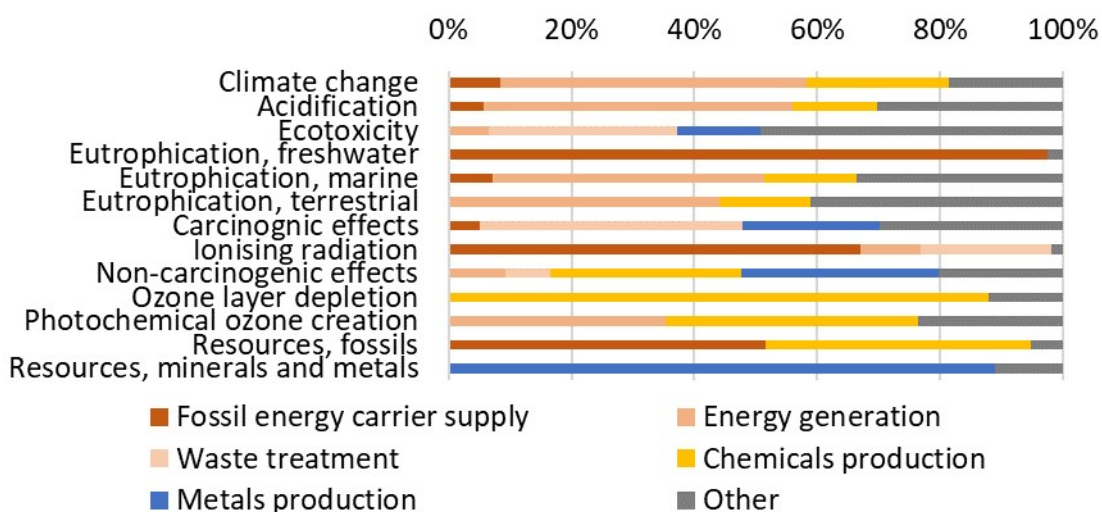

Figure SI 4 Contribution analysis results by sectors for a) CO-based polyol and b) CO<sub>2</sub>-based polyol for scenario 3.

## References

- 1 M. Aly, T. G. Gambu, Y. Zhang, V. V. Galvita and M. Saeys, *ACS Catal*, 2022, **12**, 9011–9022.
- 2 M. Flores-Granobles and M. Saeys, *Energy Convers Manag*, 2022, **258**, 115515.
- 3 M. R. Machat, J. Marbach, H. Schumacher, S. Raju, M. Lansing, L. C. Over, L. Adler, J. Langanke, A. Wolf, W. Leitner and C. Gürtler, *React Chem Eng*, 2022, **7**, 580–589.
